# Supplementary material for: Synthesis of ABC type miktoarm star copolymers by triple click chemistry
Source: Royal Society of Chemistry journal article supplement (doi:10.1039/c1py00352f), 2011-01-01
Supplement: c1py00352f.pdf [file c1py00352f.pdf]

## Supporting Information

### Synthesis of ABC Type Miktoarm Star Copolymers by Triple Click Chemistry

**Birol Iskin, Gorkem Yilmaz, Yusuf Yagci\***

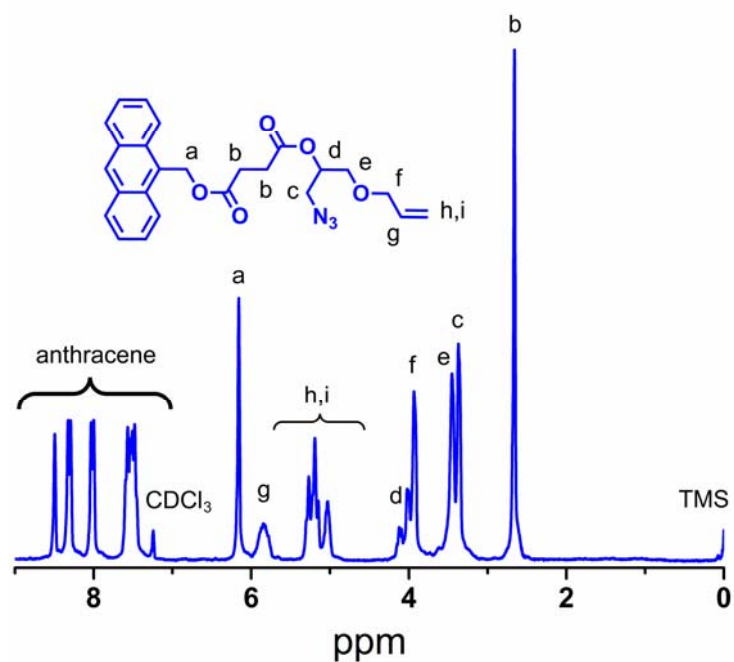

SF1. <sup>1</sup>H NMR spectrum of the core compound, AAS

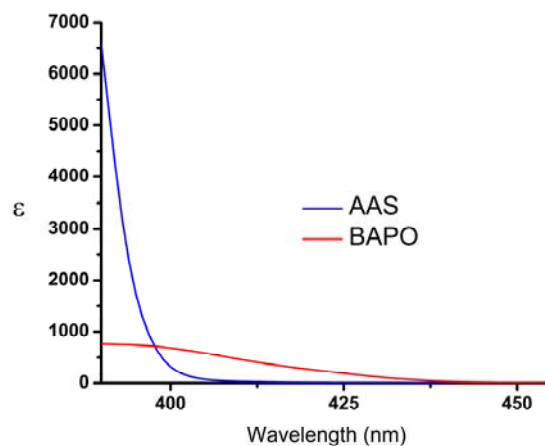

SF2. UV-vis spectra of AAS and BAPO

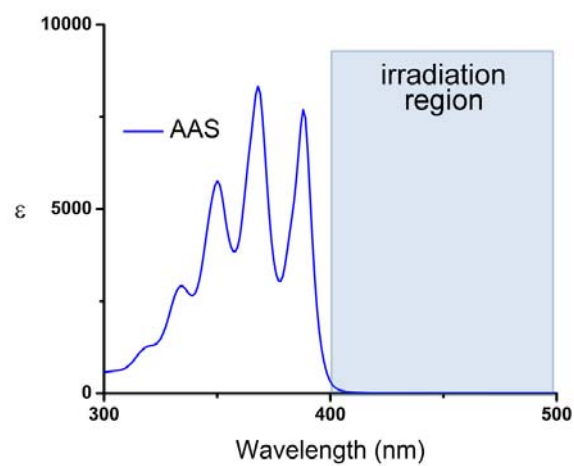

SF3. Absorption spectrum of AAS and irradiation wavelength for thiol-ene reaction
